# Supplementary material for: Synthesis of novel biobased polyimides derived from isomannide with good optical transparency, solubility and thermal stability
Source: Royal Society of Chemistry journal article supplement (doi:10.1039/c5ra14526k), 2015-01-01
Supplement: c5ra14526k1.pdf [file c5ra14526k1.pdf]

## Supplementary information for

### Synthesis of novel biobased polyimides derived from isomannide with good optical transparency, solubility and thermal stability

Gaili Yang,<sup>a</sup> Rui Zhang,<sup>a</sup> Huahua Huang,<sup>\*a</sup> Lixin Liu,<sup>a</sup> Lei Wang<sup>\*b</sup> and Yongming Chen<sup>\*a</sup>

<sup>a</sup> Key Laboratory for Polymeric Composite and Functional Materials of Ministry of Education, School of Chemistry and Chemical Engineering, Sun Yat-sen University, No. 135, Xingang Xi Road, Guangzhou 510275, China. E-mail: huanghh27@mail.sysu.edu.cn (H. Huang), chenym35@mail.sysu.edu.cn (Y. Chen).

<sup>b</sup> Shenzhen Key Laboratory of Special Functional Materials, College of Material Science, Shenzhen University, Shenzhen 518060, China. E-mail: wl@szu.edu.cn (L. Wang).

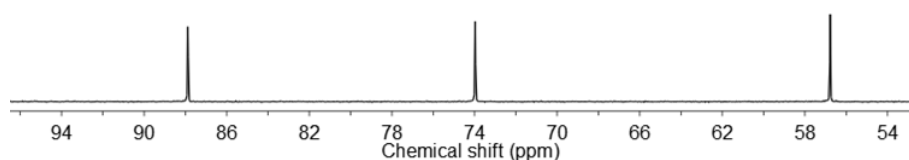

**Fig. S1** <sup>13</sup>C NMR spectrum of diamine **M1** (D<sub>2</sub>O, 400 MHz).

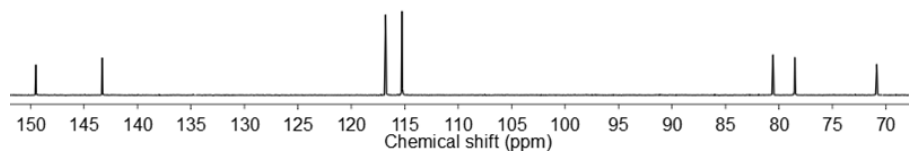

**Fig. S2** <sup>13</sup>C NMR spectrum of diamine **M2** (DMSO-*d*<sub>6</sub>, 400 MHz).

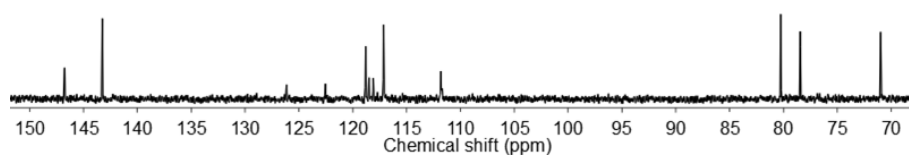

**Fig. S3** <sup>13</sup>C NMR spectrum of diamine **M3** (DMSO-*d*<sub>6</sub>, 400 MHz).

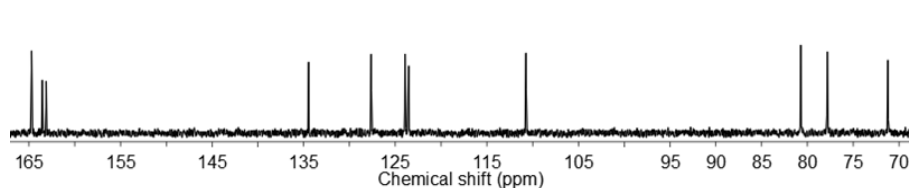

**Fig. S4** <sup>13</sup>C NMR spectrum of diamine **M4** (DMSO-*d*<sub>6</sub>, 400 MHz).

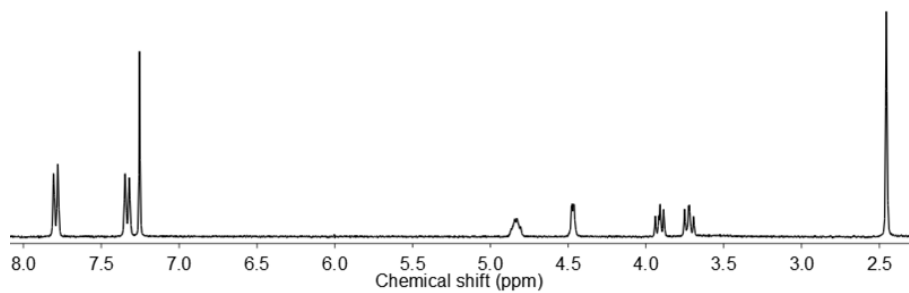

**Fig. S5**  $^1\text{H}$  NMR spectrum of compound 1 ( $\text{CDCl}_3$ , 400 MHz).

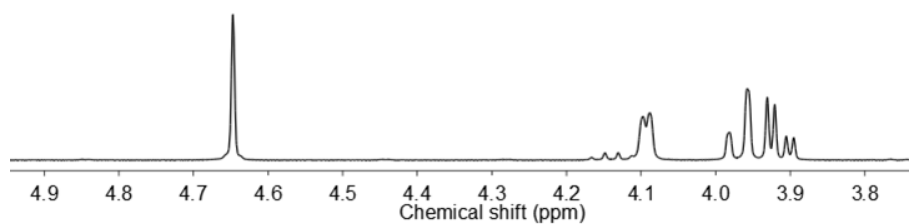

**Fig. S6**  $^1\text{H}$  NMR spectrum of compound 2 ( $\text{CDCl}_3$ , 400 MHz).

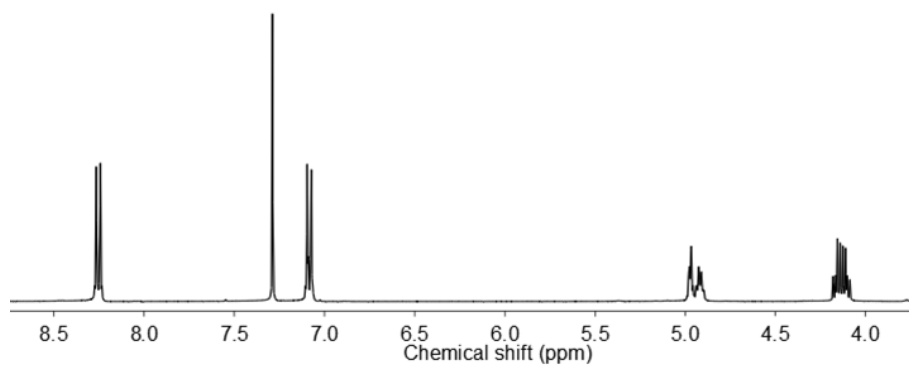

**Fig. S7**  $^1\text{H}$  NMR spectrum of compound 3 ( $\text{CDCl}_3$ , 400 MHz).

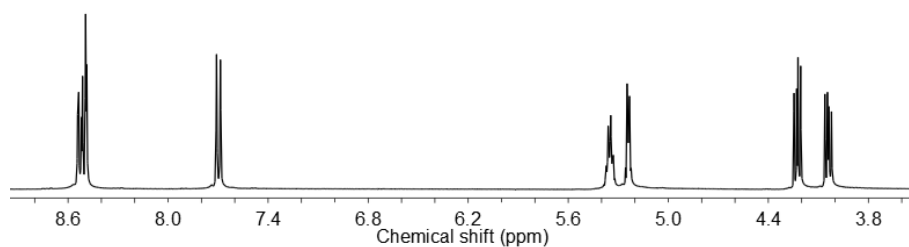

**Fig. S8**  $^1\text{H}$  NMR spectrum of compound 4 ( $\text{CDCl}_3$ , 400 MHz).

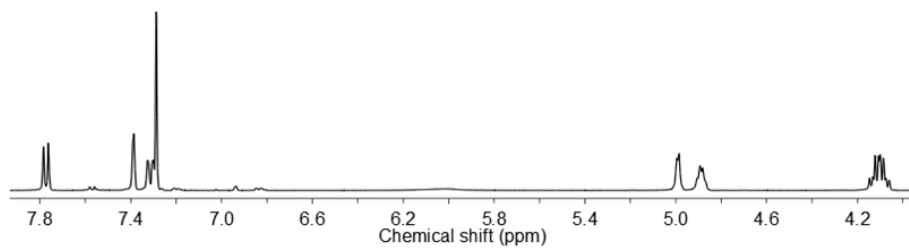

**Fig. S9**  $^1\text{H}$  NMR spectrum of compound 5 ( $\text{CDCl}_3$ , 400 MHz).

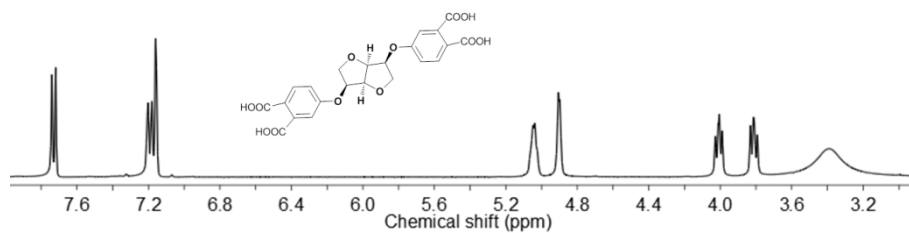

**Fig. S10**  $^1\text{H}$  NMR spectrum of the tetra-acid intermediate ( $\text{CDCl}_3$ , 400 MHz).
